# Supplementary material for: Transcriptome sequencing and metabolite analysis reveals the role of delphinidin metabolism in flower colour in grape hyacinth
Source: PubMed Central journal article supplement (PMC4071837; doi:10.1093/jxb/eru168), 2014-04-30

FLAVONOID BIOSYNTHESIS

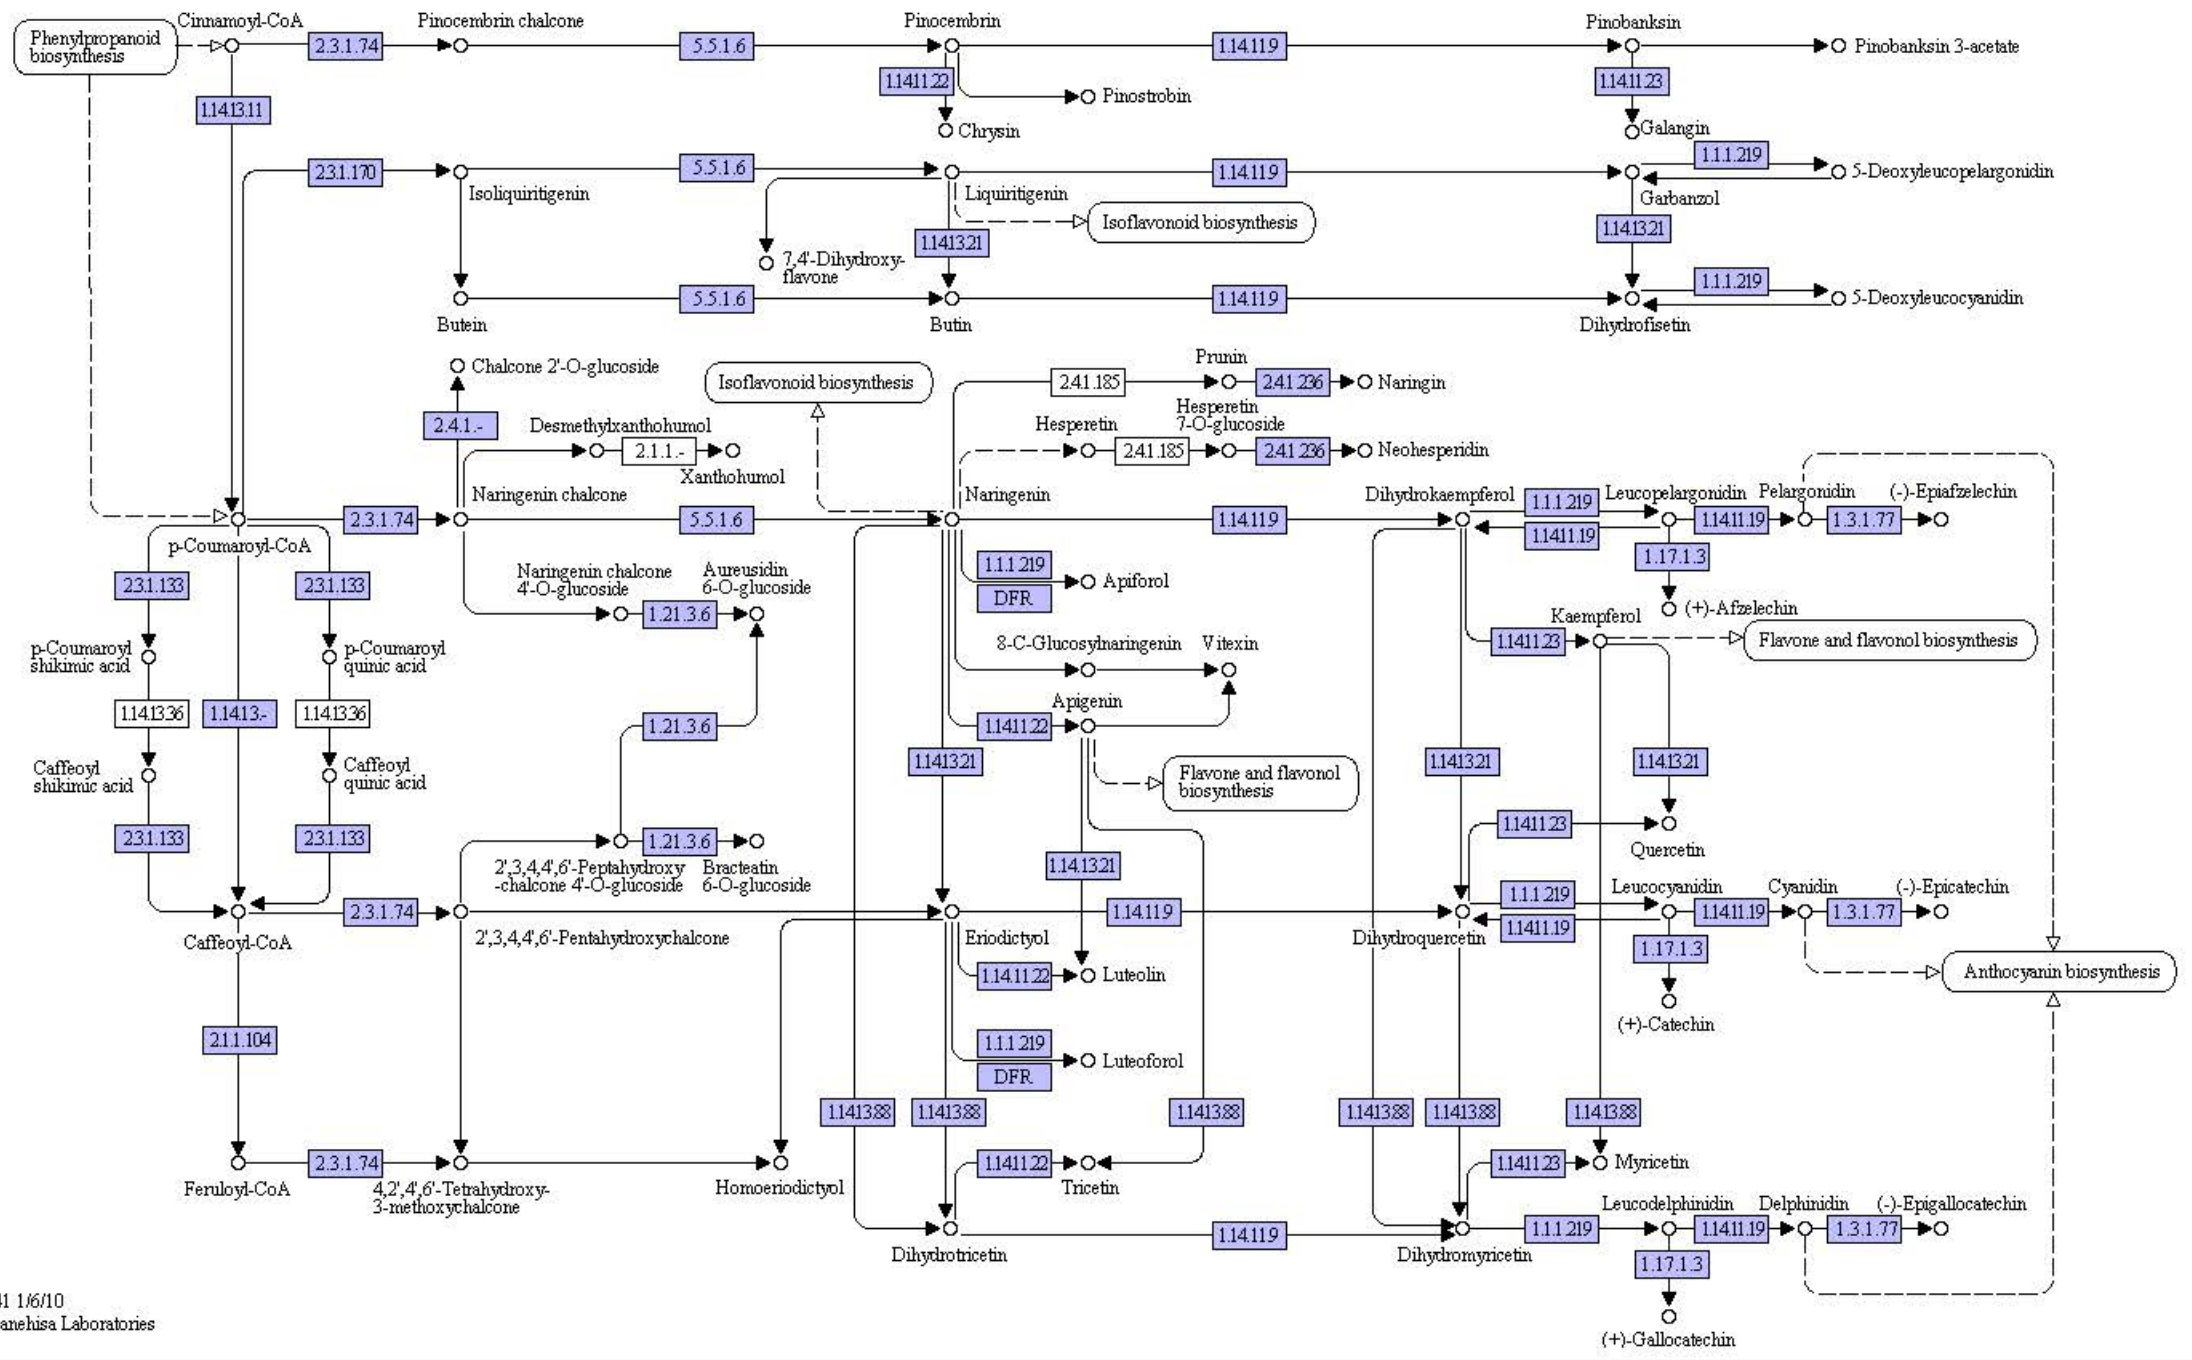

# ANTHOCYANIN BIOSYNTHESIS

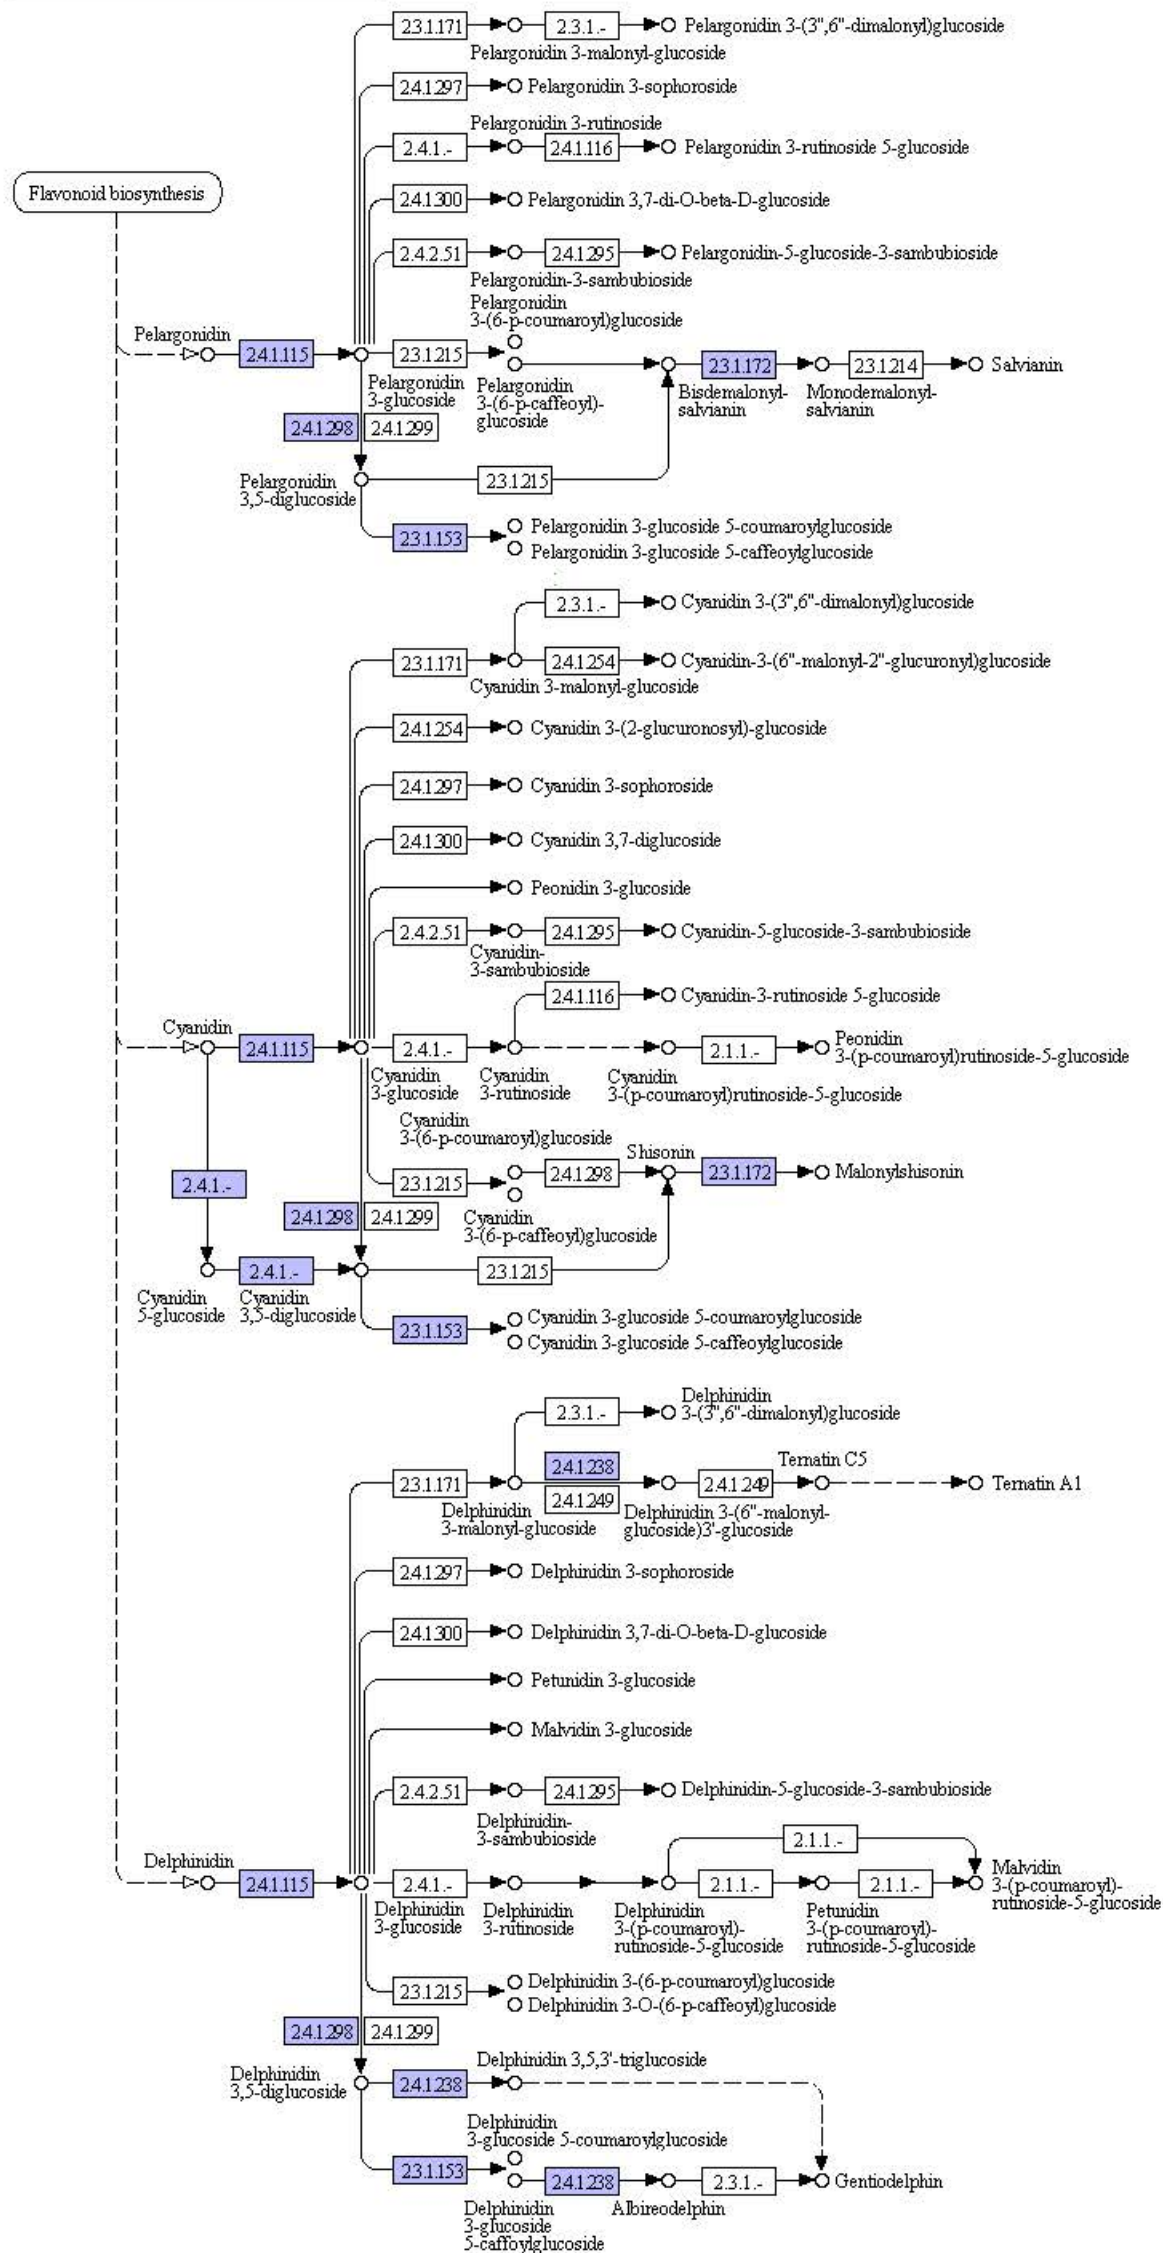

# FLAVONE AND FLAVONOL BIOSYNTHESIS

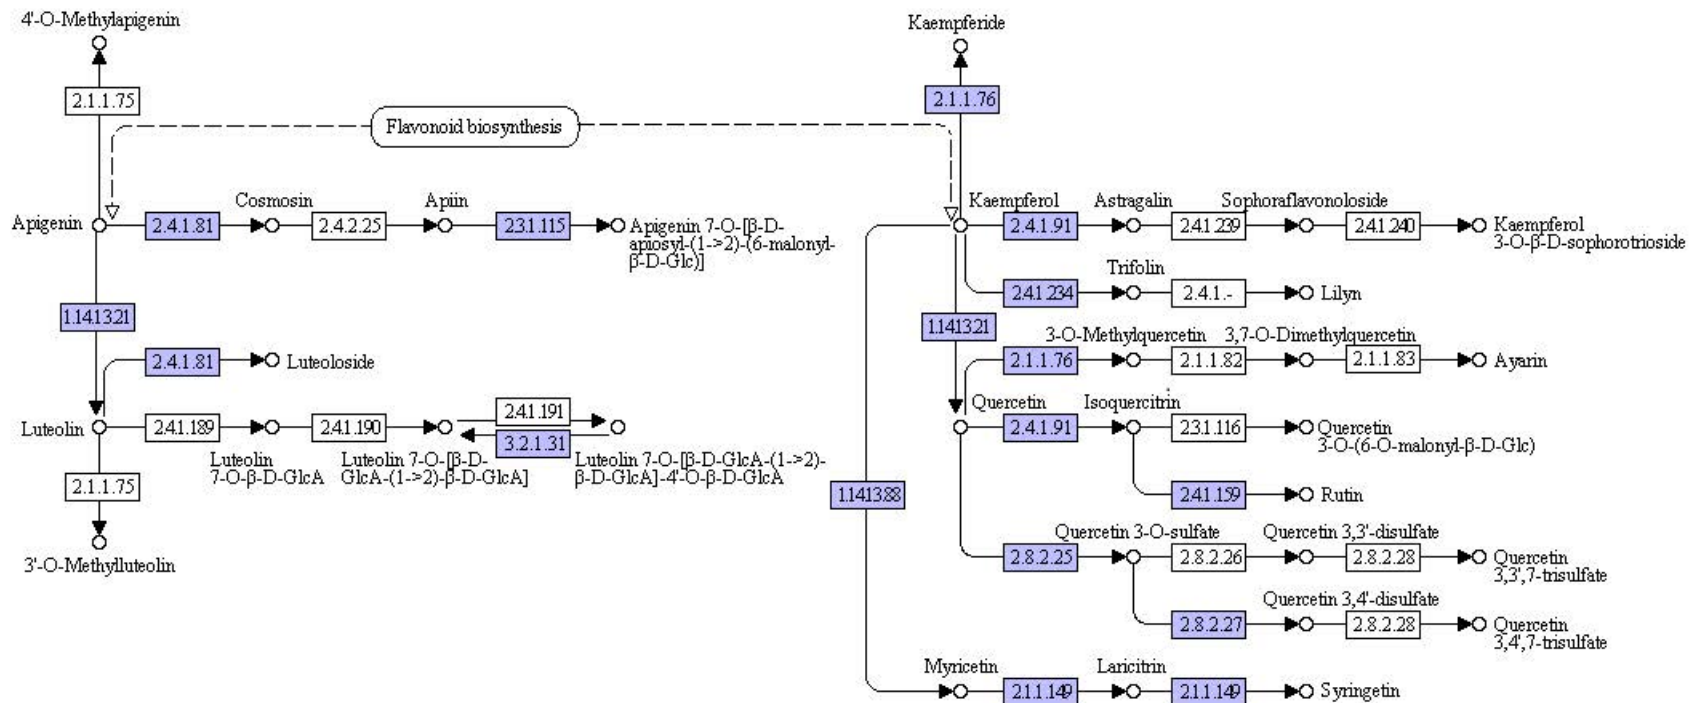

Supplement: supp_eru168_jexbot113068_file004.pdf [file supp_eru168_jexbot113068_file004.pdf]
